# Supplementary material for: Visualization of aging-associated chromatin alterations with an engineered TALE system
Source: PubMed Central journal article supplement (PMC5385610; doi:10.1038/cr.2017.18), 2017-01-31
Supplement: cr201718x1.pdf [file cr201718x1.pdf]

A

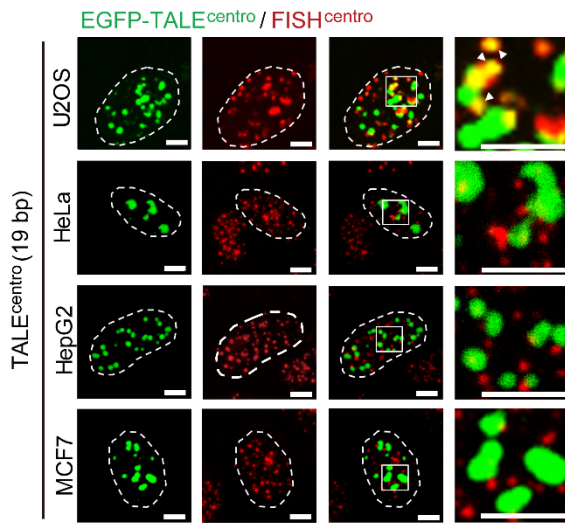

B

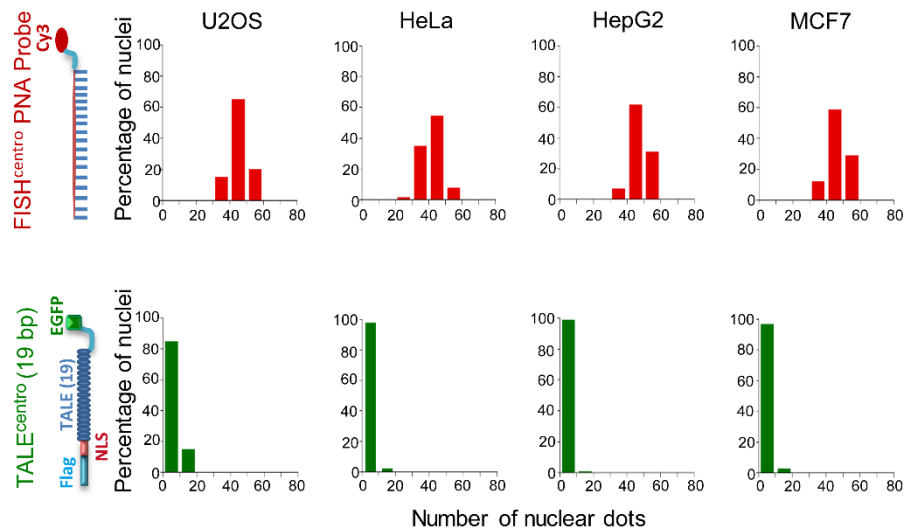

C

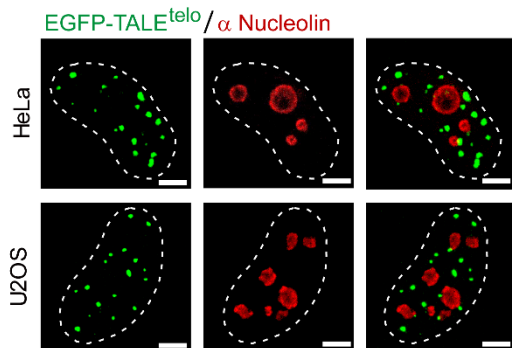

D

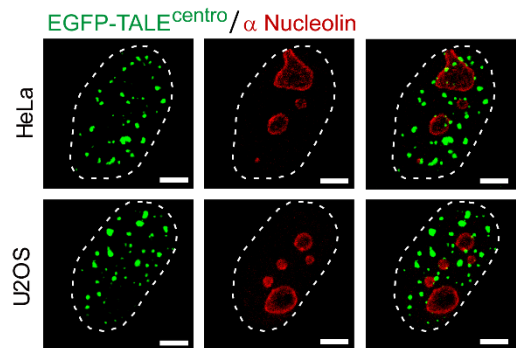

**Supplementary information, Figure S1** Unmodified TALEs were insufficient to visualize centromeres in four tumor cell lines. **(A)** Co-localization analysis of EGFP-TALE<sup>centro</sup> (green) and centromeric FISH (red) signals in U2OS, HeLa, HepG2, and MCF7 cells. EGFP-TALE<sup>centro</sup> was designed using a 19-bp centromeric DNA sequence. Dashed lines indicate the nuclear boundary; arrowheads indicate overlapping signals. Scale bars, 5  $\mu$ m. **(B)** Histograms showing numbers of centromeric FISH- or EGFP-TALE<sup>centro</sup> (19 bp)-positive dots in nuclei of indicated cell lines.  $n = 50$  nuclei per line. **(C)** The absence of co-localization between EGFP-TALE<sup>telo</sup> (green) and nucleolin (red, IF) in U2OS and HeLa cells, respectively. Dashed lines indicate the nuclear boundary. Scale bars, 5  $\mu$ m. **(D)** The absence of co-localization between EGFP-TALE<sup>centro</sup> (green) and nucleolin (red, IF) in U2OS and HeLa cells, respectively. Dashed lines indicate the nuclear boundary. Scale bars, 5  $\mu$ m.
