# Supplementary material for: Visualization of aging-associated chromatin alterations with an engineered TALE system
Source: PubMed Central journal article supplement (PMC5385610; doi:10.1038/cr.2017.18), 2017-01-31
Supplement: cr201718x2.pdf [file cr201718x2.pdf]

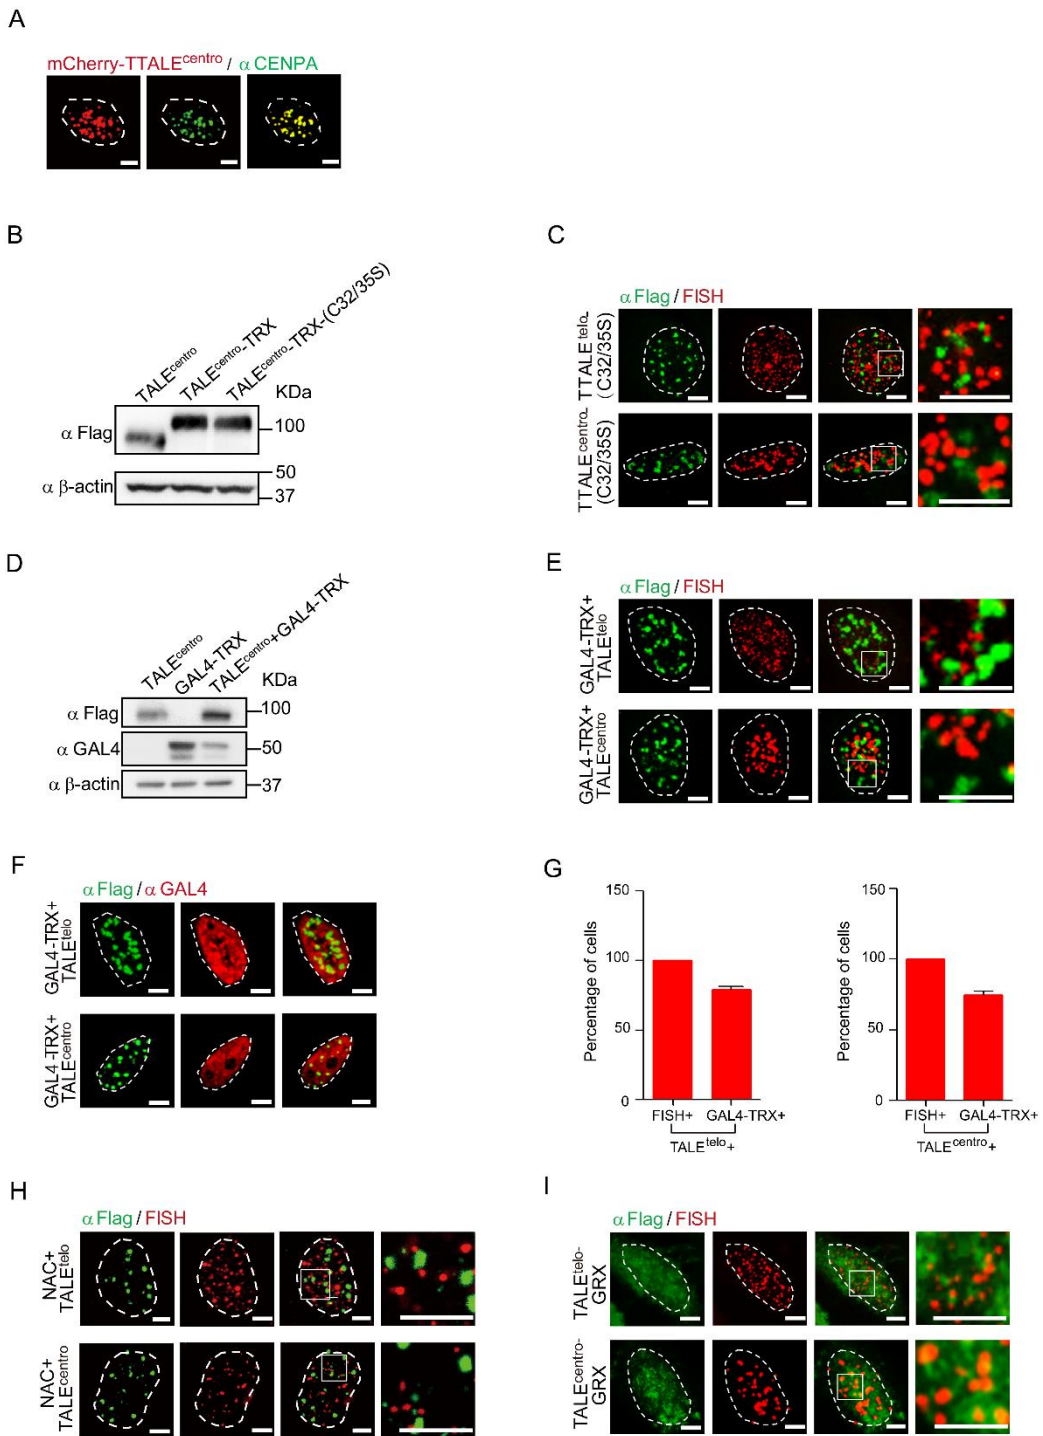

**Supplementary information, Figure S2** Fusion with thioredoxin relocated TALE to telomere and centromere loci in a redox-activity dependent manner. **(A)** Co-localization of CENPA (green) and mCherry-TTAL<sup>centro</sup> (red) in HeLa cells. Dashed lines indicate the nuclear boundary. Scale bars, 5  $\mu$ m. **(B)** Western blot detection of TALE<sup>centro</sup>, TRX-fused TALE<sup>centro</sup> (TTAL<sup>centro</sup>), and a redox-inactive thioredoxin mutant-fused TALE<sup>centro</sup> (TRX (C32/35S)-TTAL<sup>centro</sup>) in HeLa cells transiently transfected with the corresponding plasmids.  $\beta$ -actin was used as a loading control. **(C)** Fusion of TRX (C32/35S) failed to direct TALE to telomeric or centromeric loci. Dashed lines indicate the nuclear boundary. Scale bars, 5  $\mu$ m. **(D)** Western blot detection of TALE<sup>centro</sup> and GAL4-TRX in HeLa cells co-transfected with the indicated plasmids.  $\beta$ -actin was used as a loading control. **(E-F)** Co-localization analysis of FISH (red; E) and Flag-TALE (green; E-F) signals in HeLa cells co-expressing GAL4-TRX and Flag-TALE<sup>telo</sup> or Flag-TALE<sup>centro</sup>. GAL4-TRX and Flag-TALE were detected by immunofluorescence using anti-GAL4 and anti-Flag antibodies, respectively. Dashed lines indicate the nuclear boundary. Scale bars, 5  $\mu$ m. No co-localization between TALE and FISH signals was observed in the presence of co-expressed GAL4-TRX (E). **(G)** Histograms showing numbers of telomeric FISH or centromeric FISH positive- and GAL4-TRX positive cells in the pools of TALE<sup>telo</sup> positive- (left) or TALE<sup>centro</sup> positive- (right) HeLa cells. n = 200 cells. This result indicated that the majority of cells expressed both TALE and GAL4-TRX in Figure S2E-F. **(H)** Co-localization analysis of telomeric or centromeric FISH (red) and Flag-TALE<sup>telo</sup> or Flag-TALE<sup>centro</sup> (green) in HeLa cells treated with N-acetyl cysteine (NAC, 2.5  $\mu$ M) for 24 hours. Dashed lines indicate the nuclear boundary. Scale bars, 5  $\mu$ m. **(I)** Co-localization analysis of telomeric or centromeric FISH (red) and Flag-TALE<sup>telo</sup> or Flag-TALE<sup>centro</sup> (green) fused with glutaredoxin (GRX) in HeLa cells. Dashed lines indicate the nuclear boundary. Scale bars, 5  $\mu$ m.
