# Supplementary material for: Visualization of aging-associated chromatin alterations with an engineered TALE system
Source: PubMed Central journal article supplement (PMC5385610; doi:10.1038/cr.2017.18), 2017-01-31
Supplement: cr201718x3.pdf [file cr201718x3.pdf]

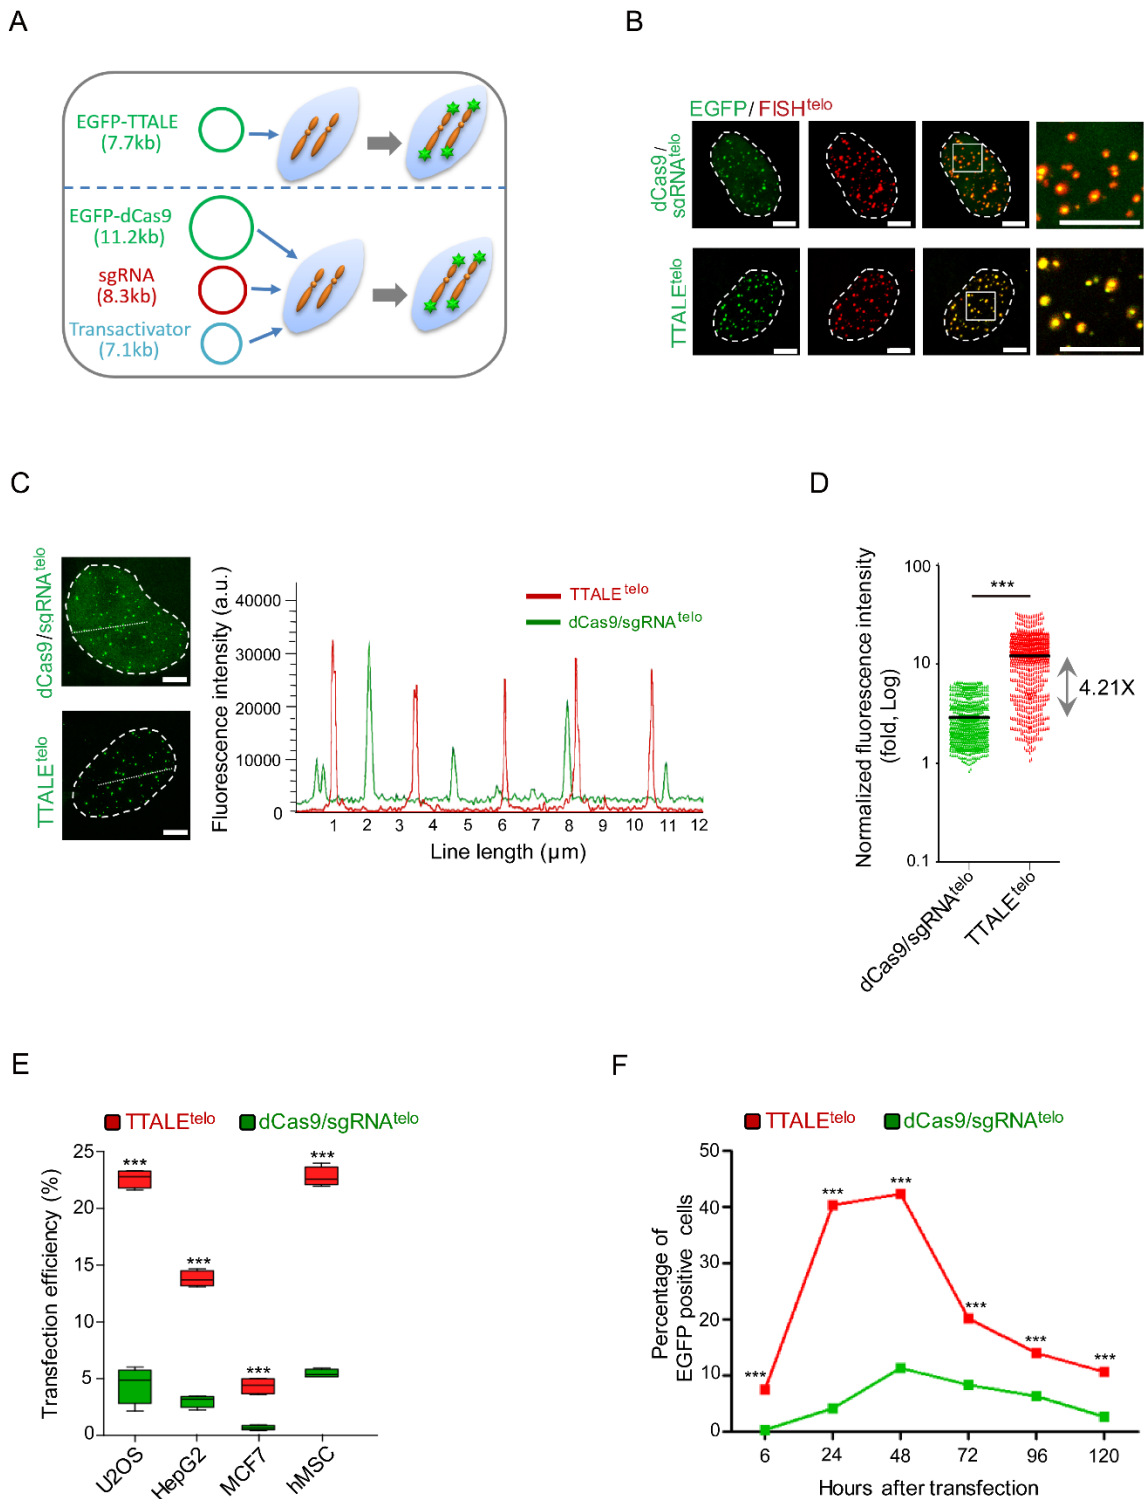

**Supplementary information, Figure S3** Comparison of TTALE and dCas9/sdRNA-based genomic imaging techniques. **(A)** Schematic diagram showing different transfection complexes required for TTALE<sup>telo</sup> and dCas9/sdRNA<sup>telo</sup> imaging systems. **(B)** Comparison of EGFP-dCas9/sdRNA<sup>telo</sup>-mediated (top) and EGFP-TTALE<sup>telo</sup>-mediated (bottom) telomeric labeling. Dashed lines indicate the nuclear boundary. Scale bars, 5  $\mu$ m. **(C)** Left: Telomeric imaging using EGFP-dCas9/sdRNA<sup>telo</sup> (top) and EGFP-TTALE<sup>telo</sup> (bottom) by SIM. Dashed lines indicate the nuclear boundary. Scale bars, 5  $\mu$ m. Dotted lines represent 12  $\mu$ m in length. Right: Intensity profiles across EGFP-TTALE<sup>telo</sup>- and EGFP-dCas9/sdRNA<sup>telo</sup>-labeled telomeres as indicated by the dotted line in the images on the left. **(D)** Log-scale scatter plot showing normalized fluorescence intensity from each identified telomere in 50 nuclei labeled by EGFP-TTALE<sup>telo</sup> or EGFP-dCas9/sdRNA<sup>telo</sup>. **(E)** Transfection efficiency of EGFP-TTALE<sup>telo</sup> and EGFP-dCas9/sdRNA<sup>telo</sup> systems detected by flow cytometry in the indicated cell types. Flow cytometry analysis was performed 24 hours post-transfection.  $n = 6$ ; \*\*\* $p < 0.001$ . **(F)** Time course showing transfection efficiency with dCas9/sdRNA<sup>telo</sup> or TTALE<sup>telo</sup> detected by flow cytometry in U2OS cells. Flow cytometry analysis was performed 6, 24, 48, 72, 96, and 120 hours after transfection.  $n = 6$ ; \*\*\* $p < 0.001$ .
