# Supplementary material for: Visualization of aging-associated chromatin alterations with an engineered TALE system
Source: PubMed Central journal article supplement (PMC5385610; doi:10.1038/cr.2017.18), 2017-01-31
Supplement: cr201718x6.pdf [file cr201718x6.pdf]

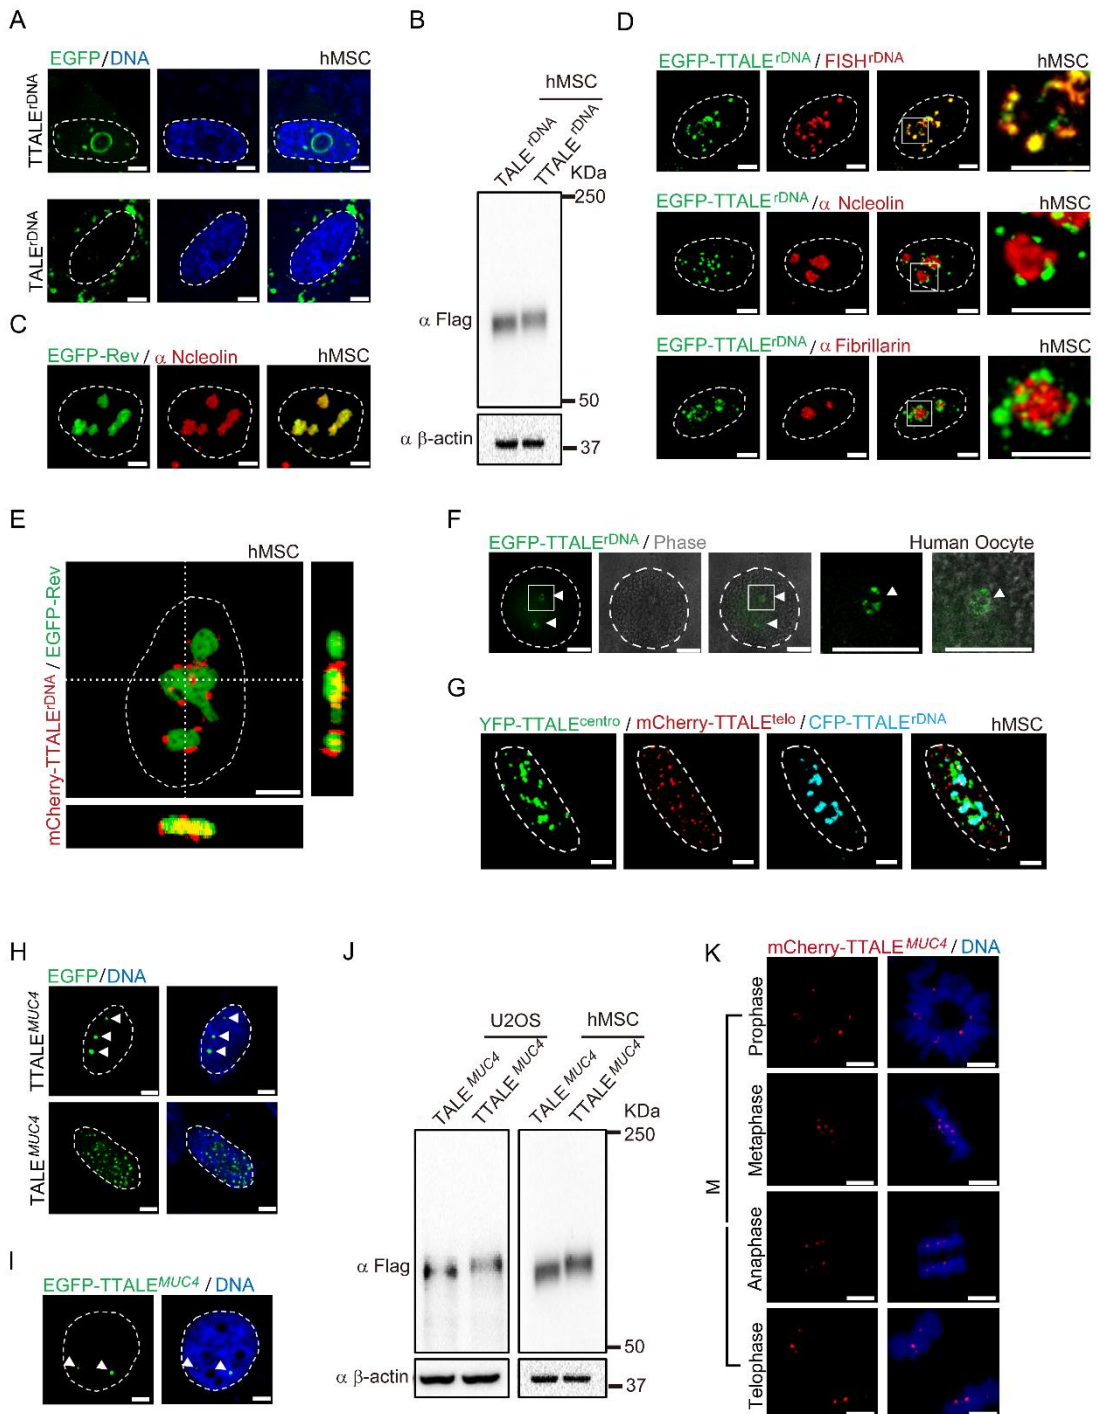

**Supplementary information, Figure S6** TTALE-based imaging of NOR-rDNAs and *MUC4*. **(A)** Localization of unmodified EGFP-TALE<sup>rDNA</sup> (bottom) and EGFP-TTALE<sup>rDNA</sup> (top) in hMSCs. Dashed lines indicate the nuclear boundary. Scale bars, 5  $\mu$ m. **(B)** Western blots demonstrating correct expression of TALE<sup>rDNA</sup> and TTALE<sup>rDNA</sup> in hMSCs.  $\beta$ -actin was used as a loading control. **(C)** Co-localization of EGFP-Rev (green) and nucleolin (red). Dashed lines indicate the nuclear boundary. Scale bars, 5  $\mu$ m. **(D)** Co-localization of EGFP-TTALE<sup>rDNA</sup> (green) and rDNA FISH (top), nucleolin (middle), or fibrillarin (bottom) (red) in hMSCs. Dashed lines indicate the nuclear boundary. Scale bars, 5  $\mu$ m. **(E)** Live cell imaging of mCherry-TTALE<sup>rDNA</sup> (red) and EGFP-Rev (green) in hMSCs. Slice view of stacks along the two dotted lines are shown respectively on the right or bottom. Scale bars, 5  $\mu$ m. **(F)** TTALE<sup>rDNA</sup>-mediated visualization of NOR-rDNA in live human oocytes. Dashed lines indicate the cellular boundary. Arrowheads indicate NOR-rDNA loci. Scale bars, 33  $\mu$ m. **(G)** Simultaneous visualization of telomeres, centromeres, and rDNAs in a single live cell using mCherry-TTALE<sup>telo</sup>, YFP-TTALE<sup>centro</sup>, and CFP-TTALE<sup>rDNA</sup>. Dashed lines indicate the nuclear boundary. Scale bars, 5  $\mu$ m. **(H-I)** Unmodified TALE<sup>MUC4</sup> (bottom) and TTALE<sup>MUC4</sup> (top) in HeLa cells (H) and hMSCs (I). Dashed lines indicate the nuclear boundary; arrowheads indicate *MUC4* loci. Scale bars, 5  $\mu$ m. **(J)** Western blots showing correct expression of TALE<sup>MUC4</sup> and TTALE<sup>MUC4</sup> in U2OS cells or wild type hMSCs.  $\beta$ -actin was used as a loading control. **(K)** Visualization of *MUC4* locus at different stages of mitosis by mCherry-TTALE<sup>MUC4</sup> (red) in HeLa cells. Hoechst was used to label DNA (blue). Scale bars, 5  $\mu$ m.
