# Supplementary material for: Visualization of aging-associated chromatin alterations with an engineered TALE system
Source: PubMed Central journal article supplement (PMC5385610; doi:10.1038/cr.2017.18), 2017-01-31
Supplement: cr201718x9.pdf [file cr201718x9.pdf]

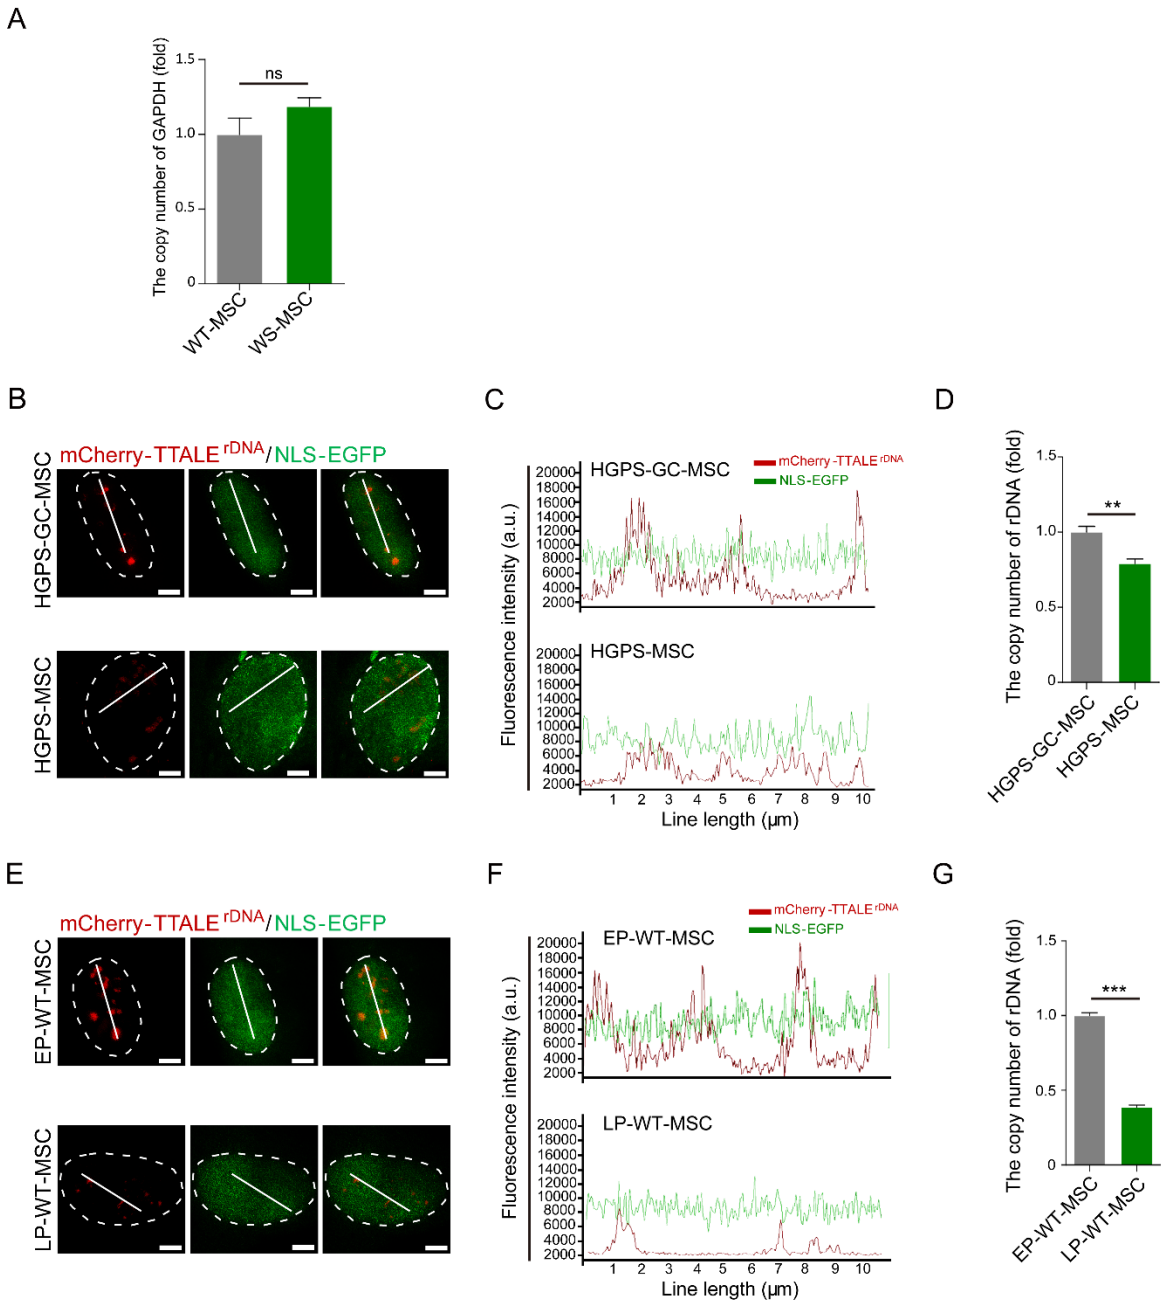

**Supplementary information, Figure S9** TTALE-based imaging of attrition of NOR-rDNAs in senescent hMSCs. **(A)** Quantitative PCR analysis showing no significant difference of *GAPDH* gene copy number in WS-MSCs relative to WT-MSCs. Data were presented as mean  $\pm$  SEM;  $n = 3$ ; NS, not significant. **(B, E)** SIM images showing diminished mCherry-TTALE<sup>rDNA</sup> fluorescence in HGPS-MSCs (passage 8) compared to HGPS-GC-MSCs (passage 8) (B) and LP-WT-MSCs (passage 12) compared to EP-WT-MSCs (passage 6) (E). NLS-EGFP was co-transfected as an internal control. Dashed lines indicate the nuclear boundary. Scale bars, 5  $\mu\text{m}$ . **(C, F)** Intensity profiles across TTALE<sup>rDNA</sup>-labeled rDNAs in HGPS-GC-MSCs and HGPS-MSCs (C) and EP-WT-MSCs and LP-WT-MSCs (F) as indicated by solid lines in Figure S9B and S9E, respectively. Solid lines represent 10  $\mu\text{m}$  in length. **(D, G)** qPCR analysis indicating a reduction in rDNA copy number in HGPS-MSCs relative to WT control cells (D) and LP-WT-MSCs (passage 12) compared to EP-WT-MSCs (passage 6) (G). Data were presented as mean  $\pm$  SEM;  $n = 3$ ; \*\* $p < 0.01$ ; \*\*\* $p < 0.001$ .
