# Supplementary material for: Visualization of aging-associated chromatin alterations with an engineered TALE system
Source: PubMed Central journal article supplement (PMC5385610; doi:10.1038/cr.2017.18), 2017-01-31
Supplement: cr201718x10.pdf [file cr201718x10.pdf]

A

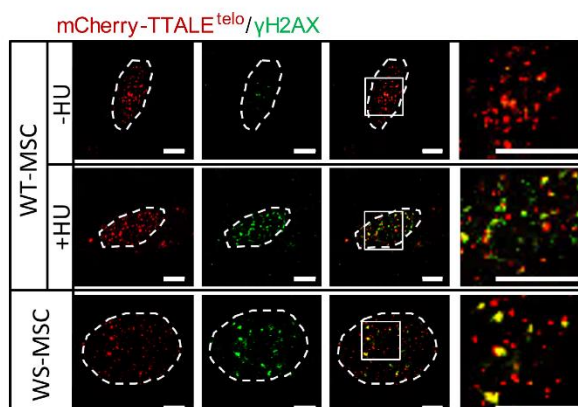

B

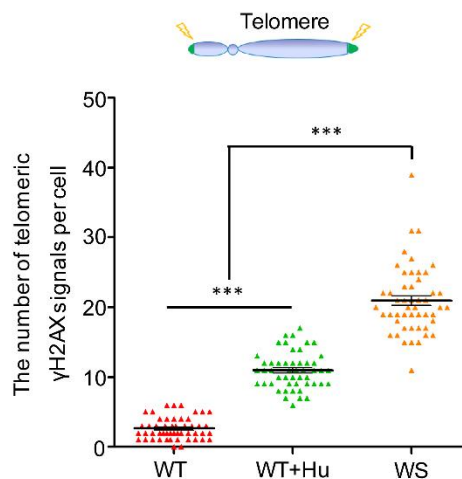

C

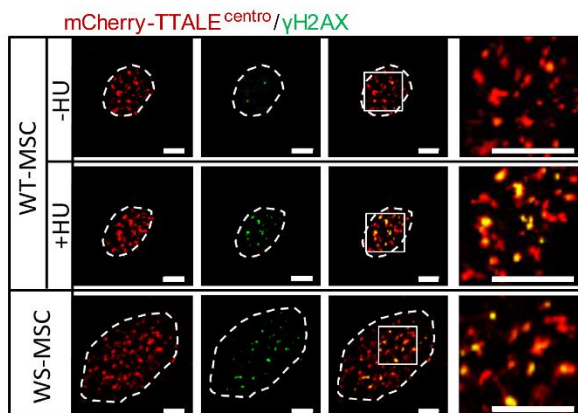

D

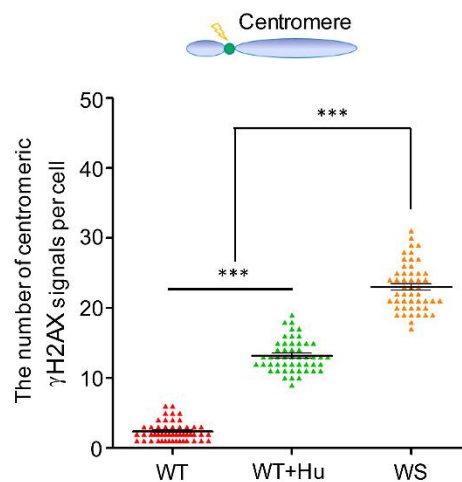

**Supplementary information, Figure S10** TTALE-mediated visualization of aging-associated DDRs at telomeric and centromeric loci. (A, C) Immunofluorescence analysis of  $\gamma$ -H2AX (green) expression in mCherry-TTALE<sup>telo</sup>-transfected (red) (A) and mCherry-TTALE<sup>centro</sup>-transfected (red) (C) WT and WS hMSCs. HU treatment (10 nM, 2 hours) was used as a positive control to induce  $\gamma$ -H2AX. Dashed lines indicate the nuclear boundary. Scale bars, 5  $\mu$ m. (B, D) Number of  $\gamma$ -H2AX-positive telomeres (B) or centromeres (D) per cell in WS hMSCs, untreated WT hMSCs, and WT hMSCs treated with HU. n = 50 nuclei per group; \*\*\*p < 0.001.
