# Supplementary material for: Visualization of aging-associated chromatin alterations with an engineered TALE system
Source: PubMed Central journal article supplement (PMC5385610; doi:10.1038/cr.2017.18), 2017-01-31
Supplement: cr201718x11.pdf [file cr201718x11.pdf]

A

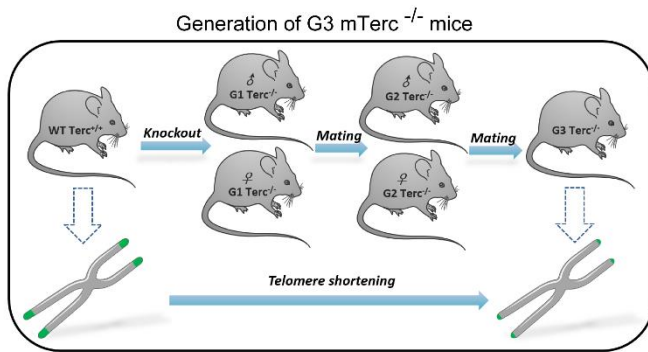

B

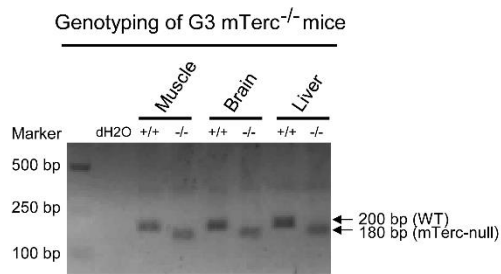

C

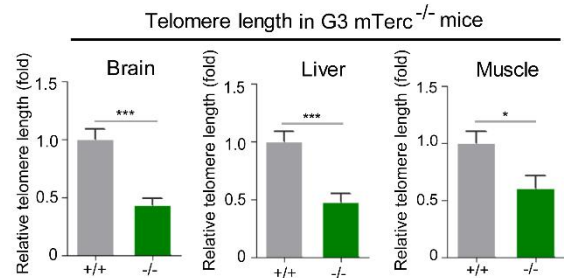

D

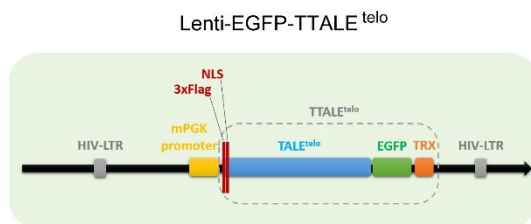

E

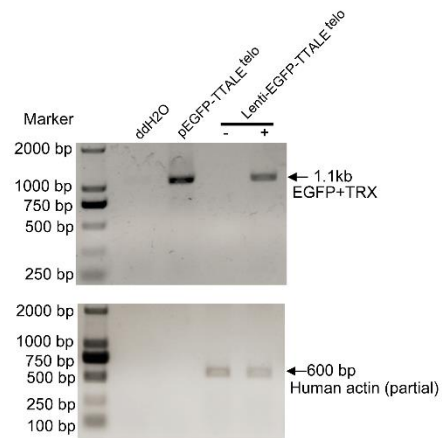

F

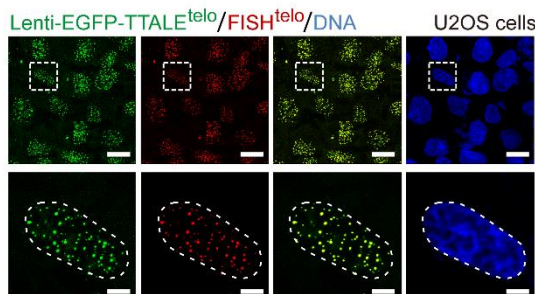

G

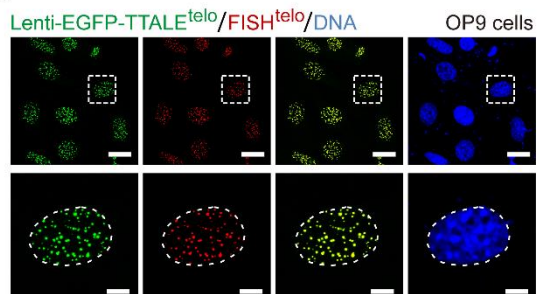

**Supplementary information, Figure S11** Lentiviral TTALE<sup>telo</sup>-mediated *in vivo* imaging of telomeres in telomerase-deficient mice. **(A)** Flow chart of generation of G3 *mTerc*<sup>-/-</sup> mice with shortened telomeres. **(B)** Genotyping of G3 *mTerc*<sup>-/-</sup> mice in different tissues including muscle, brain, and liver. **(C)** qPCR detection of telomere length in brain (left), liver (middle), and muscle (right) of WT *mTerc*<sup>+/+</sup> and G3 *mTerc*<sup>-/-</sup> mice. Values were normalized to *Mapk1*. Data were presented as mean ± SEM; n = 4; \*p < 0.05; \*\*\*p < 0.001. **(D)** Schematic illustration of the EGFP-TTALE cassette in a lentiviral vector for telomere labeling. **(E)** PCR verifying the integration of EGFP-TTALE<sup>telo</sup> cassette in the genomic DNA extracted from U2OS cells transduced with or without lentiviral EGFP-TTALE<sup>telo</sup> vector. Purified plasmid EGFP-TTALE<sup>telo</sup> was used as a positive PCR template. **(F-G)** Co-localization of EGFP-TTALE<sup>telo</sup> (green) and FISH<sup>telo</sup> (red) signals in human U2OS cells (F) and mouse OP9 cells (G) transduced with lentiviral EGFP-TTALE<sup>telo</sup> vector. Scale bars: 30 μm (top); 5 μm (bottom).
