# Supplementary material for: Visualization of aging-associated chromatin alterations with an engineered TALE system
Source: PubMed Central journal article supplement (PMC5385610; doi:10.1038/cr.2017.18), 2017-01-31
Supplement: cr201718x15.pdf [file cr201718x15.pdf]

**Supplementary information, Data S1 DNA sequencing of Lenti-EGFP-TTALetelo construct demonstrating no recombination.**

cagggtggcacttttcggggaaatgtgcgcggaaccctatttgttttttctaaatacattcaaatatgtatccgctcatgagacaataacc  
tgataaatgcttcaataatattgaaaaggaagagatgagattcaacatttccgtgctcccttattccctttttgcggcattttgccttctg  
ttttgctcaccagaaacgctggtgaaagtaaaagatgctgaagatcagttgggtgcacgagtggttacatcgaactggatctcaacagc  
ggttaagatccttgagagttttgccccgaagaacgtttccaatgatgagcacttttaagttctgctatgtggcgcggtattatcccgattgac  
gccccgcaagagcaactcggctcggcgcatacactatttccagaatgacttgggtgagtagtaccagtcacagaaaagcatcttacggatgg  
catgacagtaagagaattatgagtgctgcataacatgatgataaactcggccaacttacttctgacaacgatcggaggaccgaag  
gagtaaccgctttttgcaacatgggggatcatgtaactgccttgatcgttgggaaccggagctgaatgaagccataccaaacgacga  
gctgacaccagatgcctgtagcaatggcaacaacgttgcgcaactattaactggcgaacttacttctagcttcccggcaacaattaat  
agactggatggaggcggataaaagttgaggaccacttctgcctcggccttccgctggctggtttattgctgataaatctggagccgggta  
gctgggtctcgggtatcattgacgactggggccagatggtgaagccctccgatcgtatgttatctacacgacggggagtcaggcaactat  
ggatgaacgaaatagacagatcgtgagataggtgcctcactgattaagcattggttaactgtcagaccaagttactcatatatactttagatt  
gatttaaaactcatttttaatttaaaaggatctaggtgaagatccttttgataatctcatgacaaaatcccttaactgagttttcgttccact  
gagcgtcagaccccgtagaaaagatcaaaggatcttctgagatcctttttctgcgcgtaactgtgctgctgcaacaaaaaaaccaccgct  
accagcgggtggtttgttccggatcaagagctaccaactcttttccgaaggtaactggctcagcagagcgcagataccaaatactgtcctt  
ctagttagccgtagttaggccaccactcaagaactctgtagcaccgctacatacctcgtctgtaactcctgttaccagtggtgctgcca  
gtggcgataagtcgtgtcttaccgggttgactcaagacgatagttaccggataaggcgcagcggctgggctgaacggggggttctgtcac  
acagcccagcttgagcgaacgacctacccgaactgagatacctacagcgtgagctatgagaaagcgcacgcttcccgaaggagaaa  
ggcggacaggtatccgtaagcggcagggctggaacaggagagcgcacgagggagcttccaggggaaacgcctggtatctttatagtc  
tgtcgggttccacccttctgacttgagcgtgattttgtgagctcgtcagggggcgggagcctatggaaaaacgccagcaacggccttt  
ttacggttctggccttttctgacatgttcttctcgttatccctgattctgtgataaccgtattaccgctttagtgagct  
gataccgctcggcagccgaacgaccgagcgcagcagtgatgagcgggaagcgggaagagcgcacaatacgaacaccgctctccc  
cgcgcttggccgattcattaatgacgctggcagcagagtttccgactggaagcgggagcagcgaacgaattaatgtgagttagc  
tactcattaggcaccaggctttacactttatgcttccggctctgtatgtgtggaattgtgagcggataacaattcacacaggaacag  
ctatgacatgattacccaagcgcgcaattaacctcactaaagggaaacaaaagctggagctgcaagcttaatgtagtcttatgcaact  
ctttagtcttcaacatgtaacgatgagttagcaacatgccttacaaggagagaaaaagcaccgtgcatgccgattggtggaagtaaggt  
ggtacgatcgtccttattaggaaggcaacagacgggtctgacatggattgacgaaccactgaattgccgattgagagatattgtatta  
agtgcctagctcgtacaataaacgggtctctctggttagaccagatctgagcctgggagctctctggtaactagggaaccactgcttaag  
cctcaataaagcttgccttgagtgctcaagtagtggtgcccgtctgtgtgactctggttaactagagatccctcagacccttttagtcagt  
tgaaaaatcttagcagtgccgcccgaacaggacctgaaagcgaagggaaccagagctctctcagcagcaggactcggcttctggaag  
cgcgcacggcaagaggcagggggcggcactggtgagtagcctcaaaaattttagctagcggaggctagaaggagagatgggtcgcag  
agcgtcagtattaagcgggggagaattagatcgcgatgggaaaaaattcggtaaggccaggggaaagaaaaataaataaaacat  
atagtagggcaagcagggagctagaacgattcgcagttaatcctggcctgttagaaacatcagaaggctgtagacaaatactgggacagc  
tacaacctccctcagacaggatcagaagaacttagatcattatataatacagtagcaacccttattgtgtgcatcaaggatagagataa  
aagacccaaggaagcttagacaagatagaggaagcaaaaacaaaagtaagaccaccgcaagcaagcggcctgattcttagacc  
tggaggaggagatagaggacaattggagaagtgattatataaataaagtagtaaaattgaaccattaggagtagcaccaccaa  
ggcaagagaagagtggtgcagagagaaaaagagcagtggaataggagctttgttcttgggttcttgggagcagcaggaagcactat  
gggcgcagcctcaatgacgctgacgggtacaggccagacaattattgtctggtatagtgacgacgacagaacaatttctgagggctattgagg  
cgcaacagcatctgtgcaactcacagtctggggcatcaagcagctcaggcaagaatcctggctgtgaaagatacctaaaggatcaaca  
gctcctggggatttgggttctctgaaaaactcattgaccactgctgtgccttggatgctagttggagtaataatcttggacagatt  
ggaatcacacgacctggatggagtgggacagagaaattaacaattacacaagcttaatacactcctaattgaagaatcgaacaccgca  
agaaaaagatgaacaagaattattggaattagataatgggcaagtttgggaattggttaacatacaaaattggctgtggtatataaaatt  
attcataatgatagtaggagcttggtaggttaagaatagttttgctgtacttctatagtgaaataggttaggcaggatattcaccattatc

gtttcagaccacctccaacccccgaggggacccgacagggcccgaaggaatagaagaagaaggtggagagagagacagagacagatcc  
attcattagtgaaacggatctcgacggtaacttttaaaagaaaagggggattgggggtacagtgacggggaagaatagtagacataa  
tagcaacagacatacaactaaagaattacaaaaaaattcaaaaaattcaaaatcttctcgatggtacctaccgggtaggggagcgt  
ttccaaggcagctggagcatgctttagcagccccctgggacttggcgtacacaagtgctctgctgcacacattccacatcc  
accgtaggcgccaaccggctccgttcttgggtggccccttcgcccacttctactctcccttagtcaggaagtccccccgccccgagc  
tcgctgctgagcagctgacaaatggaagtagcacgtctcactagctctgctgacatggacagcaccgctgagcaatggaagcdgtagg  
ccttggggcagcgccaatagcagcttctccttctgcttctgggctcagagctgggaaggggtgggtccggggcgggctcagggg  
ggctcaggggcccggcgcccgaagtctccggaggccggcattctgcagcttcaaaagcgacgtctgccgctgttctcctt  
cctcatctccggccttctgacctgactctagaaggatcctcgagaccggtgccaccgagctcttgctaaatagagaaccactgctta  
tgcttatcgaaattaatcactactatagggccaccatggactataaggaccagcaggagactacaaggatcatgatattgattac  
aaagacgatgacgataagatggcccaagaagaagcggaaggtcggtatccacggagctccagcagccGTAGATTGAGAACT  
TTGGGATATTACAGCAGCAGCAGGAAAAGATCAAGCCAAAGTGAGGTCGACAGTCGCGCAGCATCAG  
AAGCGCTGGTGGGTCATGGGTTTACACATGCCACATCGTAGCCTTGTGCGCAGCACCTGCAGCCCTTGGC  
ACGGTCGCCGTCAAGTACCAGGACATGATTGCGGCGTTGCCGGAAGCCACACATGAGGCGATCGTCGGTG  
TGGGGAAACAGTGGAGCGGAGCCCAGCGCTTGAAGCCCTGTTGACGGTCGCGGGAGAGCTGAGAGGG  
CCTCCCTTACAGCTGGACACGGGCCAGTTGCTGAAGATCGGAAGCGGGGAGGAGTCACGGCGGTCGAG  
GCGGTGCACGCGTGGCGCAATGCGCTCACGGGAGCACCCCTCAACCTGACCCAGAGCAGGTCGTGGCAA  
TTGCGAGCAACATCGGGGAAAGCAGGCACTCGAAACCGTCCAGAGGTTGCTGCCTGTGCTGTGCCAAGC  
GCACGGACTTACGCCAGAGCAGGTCGTGGCAATTGCGAGCAACATCGGGGAAAGCAGGCACTCGAAAC  
CGTCCAGAGGTTGCTGCCTGTGCTGTGCCAAGCGCACGGACTAACCCAGAGCAGGTCGTGGCAATTGCG  
AGCCATGACGGGGAAAGCAGGCACTCGAAACCGTCCAGAGGTTGCTGCCTGTGCTGTGCCAAGCGCAC  
GGGTTGACCCAGAGCAGGTCGTGGCAATTGCGAGCCATGACGGGGAAAGCAGGCACTCGAAACCGTC  
CAGAGGTTGCTGCCTGTGCTGTGCCAAGCGCACGGCCTGACCCAGAGCAGGTCGTGGCAATTGCGAGCC  
ATGACGGGGAAAGCAGGCACTCGAAACCGTCCAGAGGTTGCTGCCTGTGCTGTGCCAAGCGCACGGAC  
TGACACCAGAGCAGGTCGTGGCAATTGCGAGCAACGGAGGGGAAAGCAGGCACTCGAAACCGTCCAGA  
GGTTGCTGCCTGTGCTGTGCCAAGCGCACGGACTTACCCGAACAAGTCGTGGCAATTGCGAGCAACATC  
GGGGAAAGCAGGCACTCGAAACCGTCCAGAGGTTGCTGCCTGTGCTGTGCCAAGCGCACGGACTTACG  
CCAGAGCAGGTCGTGGCAATTGCGAGCAACATCGGGGAAAGCAGGCACTCGAAACCGTCCAGAGGTTG  
CTGCCTGTGCTGTGCCAAGCGCACGGACTAACCCAGAGCAGGTCGTGGCAATTGCGAGCCATGACGGGG  
GAAAGCAGGCACTCGAAACCGTCCAGAGGTTGCTGCCTGTGCTGTGCCAAGCGCACGGGTTGACCCAGA  
GCAGGTCGTGGCAATTGCGAGCCATGACGGGGAAAGCAGGCACTCGAAACCGTCCAGAGGTTGCTGCC  
TGTGCTGTGCCAAGCGCACGGCCTGACCCAGAGCAGGTCGTGGCAATTGCGAGCCATGACGGGGAAA  
GCAGGCACTCGAAACCGTCCAGAGGTTGCTGCCTGTGCTGTGCCAAGCGCACGGACTGACACCAGAGCAGG  
TCGTGGCAATTGCGAGCAACGGAGGGGAAAGCAGGCACTCGAAACCGTCCAGAGGTTGCTGCCTGTGCT  
TGTGCCAAGCGCACGGCCTACCCAGAGCAGGTCGTGGCAATTGCGAGCAACATCGGGGAAAGCAGG  
CACTCGAAACCGTCCAGAGGTTGCTGCCTGTGCTGTGCCAAGCGCACGGACTTACGCCAGAGCAGGTCGT  
GGCAATTGCGAGCAACATCGGGGAAAGCAGGCACTCGAAACCGTCCAGAGGTTGCTGCCTGTGCTGTGCC  
CAAGCGCACGGACTAACCCAGAGCAGGTCGTGGCAATTGCGAGCCATGACGGGGAAAGCAGGCACTC  
GAAACCGTCCAGAGGTTGCTGCCTGTGCTGTGCCAAGCGCACGGGTTGACCCAGAGCAGGTCGTGGCAA  
TTGCGAGCCATGACGGGGAAAGCAGGCACTCGAAACCGTCCAGAGGTTGCTGCCTGTGCTGTGCCAAGC  
GCACGGCCTGACCCAGAGCAGGTCGTGGCAATTGCGAGCCATGACGGGGAAAGCAGGCACTCGAAAC  
CGTCCAGAGGTTGCTGCCTGTGCTGTGCCAAGCGCACGGACTGACACCAGAGCAGGTCGTGGCAATTGCG  
AGCAACGGAGGGGGAAAGCAGGCACTCGAAACCGTCCAGAGGTTGCTGCCTGTGCTGTGCCAAGCGCAC  
GGACTCACGCTGAGCAGGTAGTGGCTATTGCATCAACATCGGGGGCAGACCCGCACTGGAGTCAATCGT

mPGK promoter

3xFlag

NLS

TALE

RVD

GGCCCAGCTTTCGAGGCCGACCCCGCTGGCCGCACTACTAATGATCATCTTGATAGCGCTGGCCTGCC

TCGGCGGACGACCCGCTTGGATGCGGTGAAGAAGGGGCTCCCGCACGCGCCTGCATTGATTAAGCGGAC

CAACAGAAGGATTCCCGAGAGGACATCACATCGAGTGGCAAGTTATCAGGGA

atggtgagcaagggcgaggagct  
gttcacgggggtggtgccatcctggtcgcagctggacggcgacgtaaacggccaagttcagcgtgtccggcgagggcgaggcgatgcc  
acctacggcaagctgacctgaagttcatctgcaccaccggcaagctgcccgtgccctggcccacctctgaccacctgacctacggcgt  
gcagtgcttcagccgtaacccgaccacatgaagcagcagcacttctcaagtcgccatgccgaaggctacgtccaggagcgaccatct  
tctcaaggacgacggcaactacaagaccgcccggaggtgaagttcagggcgacacctggtgaaccgcatcgagctgaaggcctcgc  
acttcaaggaggacggcaacatcctggggcacaagctggagtacaactacaagccacaactctatatcatggccgacaagcagaaga  
acggcatcaagtgaaactcaagatccgccacaactcagggacggcagcgtgcagctcggcaccactaccagcagaacacccccatcg  
gcgacggccccgtgctgctcccgacaaccactacgtgacccagctcgccttgagcaaaagcccaacgagaagcgcgatcacatgg  
tcctgctggagttcgtgaccgccgggatcactctcgcatggacgagctgtacaagtccggactcagatctcagctcaagcttcaatt  
ccatggtgaagcagatcgagagcaagactgctttcaggaagccttggacgctgcaggtgataaactgtagtagttgacttctcagccact  
ggtgtggccttgcaaatgatcaagccttcttctcctctctgaaaagtattccaactgatattccttgaagtagatgtgatgactgtc  
aggatgttctcagagtgtaagtcaaatgcacacattccagtttttaagaagggacaaaaggtgggtgaattttctggagccaata  
aggaaaagcttgaagccaccattaatgaattagtctaaactcagagcggcggcgcagcgtgacgaatcaacctctggattacaaaattg  
tgaagattgactggtattcttaactatgttgcctttacgctatgtgatacgcctttaatgcctttgatcatgctattgctcccgtatgg  
ctttcatttctcctctgtataaatcctggtgctgtctttagaggagttgtggccgttgcaggcaactggcgtggtgtgactgtgtt  
gctgacgaacccccactggttggggcattgccaccactgtcagctccttccgggactttcgtttccccctcctattgccacggcggaact  
catcgccgctgccttcccgctgctggacaggggctcggctgttgggactgacaattccgtggtgttgcggggaagctgacgtcctttcca  
tggtgctcgcctgtgttgcacctggattctgcgggagctccttctgctacgtccttccggcctcaatccagcggaactccttcccgcg  
cctgctcggcctctgccccttccgctctcgcctcgcctcagacgagtcggatctccttggggcgcctccccgctggaattcgag  
ctcggtaccttaagaccaatgacttacaaggcagctgtagcttagccacttttaaaagaaaaggggggactggaagggctaattcact  
ccaacgaagacaagatctgcttttctgtactgggtctctggttagaccagatctgagcctgggagctctctggttaactaggaaccc  
actgcttaagcctcaataaagcttgccttgagtgctcaagtagtgtgcccgtctgtgtgactctggttaactagagatccctcagacct  
tttagtcagtggtgaaaatctctagcagtagtagttcatgtcatcttattcagattataacttgcaagaaatgaatatcagagagtgag  
aggaaactgtttattgagcttataatggttacaataaagcaatagcatcaaaatttcacaataaagcatttttactgcattctagttgt  
ggtttgtccaaactcatcaatgatcttatcatgtctggtctagctatcccgccctaactccgccagttccgccattctccgccccatggct  
gactaatttttttattatgcagaggccaggccgctcctgagctattccagaagtagtgaggaggctttttggaggcctaggctttt  
gctgagagctaccaattcgcctatagtgagctgattacgcgcgctcactggcctgcttttaacagctgctgactgggaaaacctgg  
cgttaccacctaatacgccttgacacatcccccttccgagctggcgtaatagcgaagaggcccaccgatcgccttccaacagtt  
gcgacgctgaatggcgaatggcgcagcgcctttagcggcgattaagcggcggtgtggtggttacgcgcagctgaccgctaca  
cttgccagcgcctagcggcctcttctcttctccttctccttctcgcacgttccggccttccccgtcaagctctaatacgggggctcc  
cttagggttccgatttagtcttacggcacctcagccccaaaaaactgattaggtgatggttcacgtagtgggccatcgccctgatagac  
ggttttccctttagcgttggagtcacgttcttaatagtgactctgttcaaacactggaacaactcaacctatctcggctctattcttt  
gattataagggtttgcccatttggcctattggttaaaaaatgagctgatttaaaaaatgaacggaatttaacaaaatattaacgtt  
tacaatttc

EGFP

TRX
